# Supplementary material for: Hypercoordinate two-dimensional transition-metal borides for spintronics and catalyst applications
Source: Royal Society of Chemistry journal article supplement (doi:10.1039/d1tc01765a), 2021-01-01
Supplement: d1tc01765a1.pdf [file d1tc01765a1.pdf]

## Supplementary Information

### Hypercoordinate Two-dimensional Transition-metal Borides for Spintronics and Catalyst Applications

Shiyao Wang, Mohammad Khazaei, Junjie Wang\* and Hideo Hosono

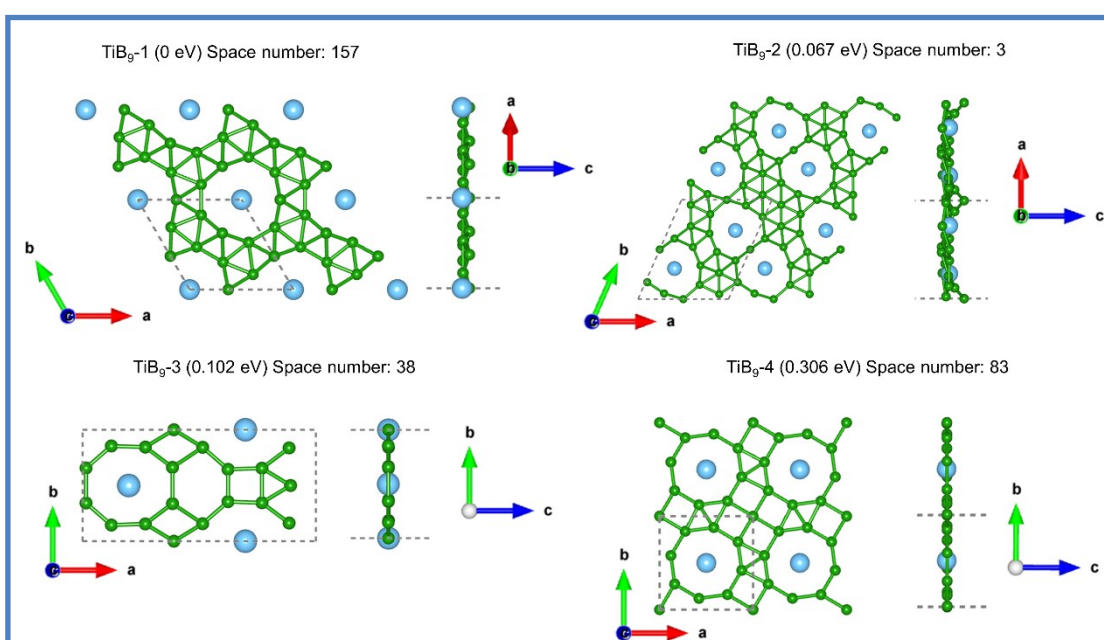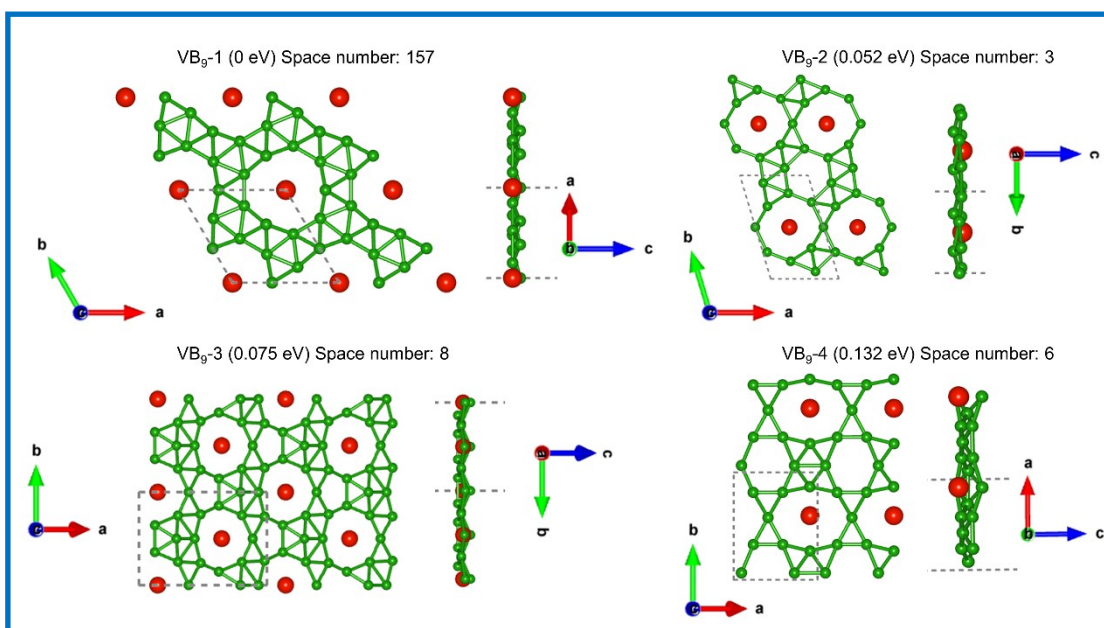

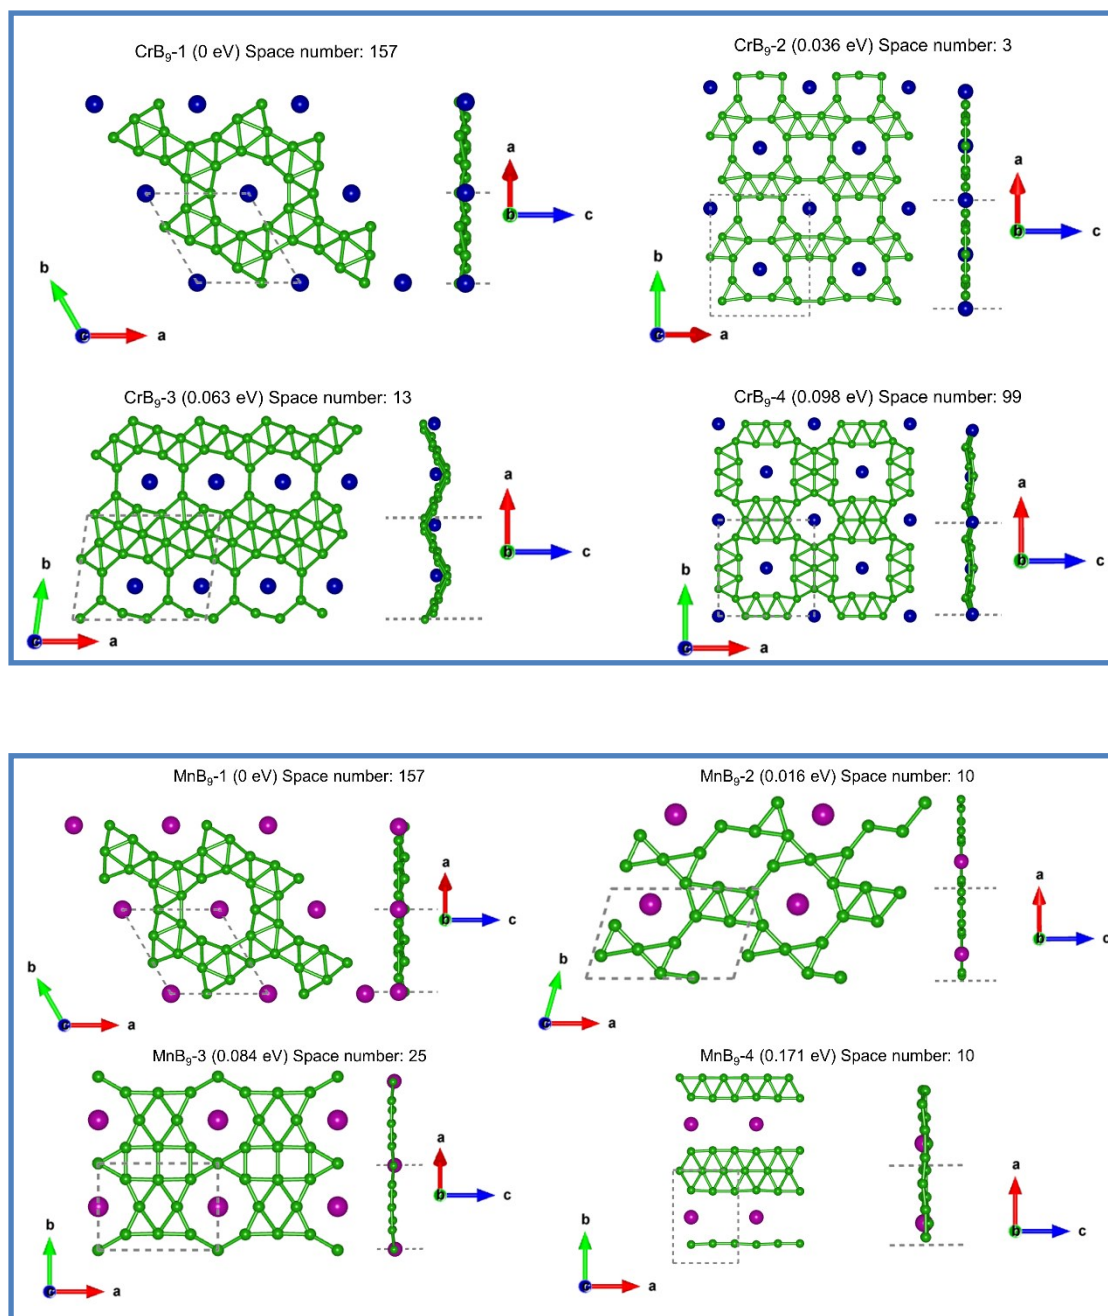

**Fig. S1** The top and side views of predicted 2-D MB<sub>9</sub> (M = Ti, V, Cr, Mn) with lower energy by USPEX code. The relative energy with respect to most stable one is calculated by the GGA method.

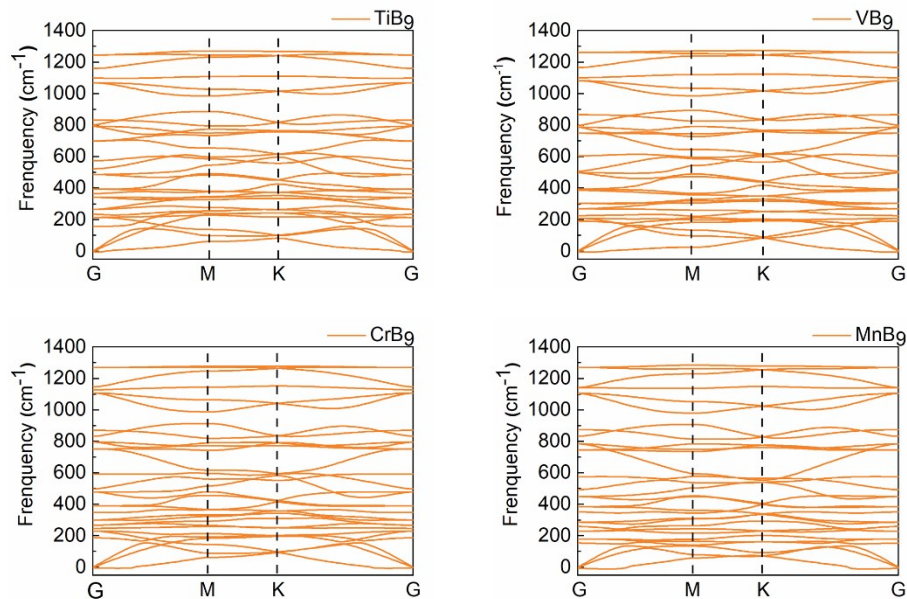

**Fig. S2** Calculated phonon spectra of  $\text{TiB}_9$ ,  $\text{VB}_9$ ,  $\text{CrB}_9$ , and  $\text{MnB}_9$  by employing PBE functional.

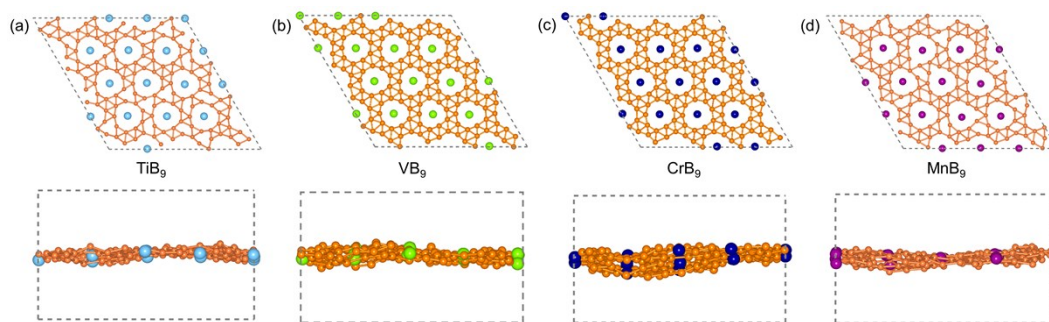

**Fig. S3** Top and side views of snapshots of  $\text{MB}_9$  equilibrium structures at 600 K after 12 ps AIMD simulations: a)  $\text{TiB}_9$ , b)  $\text{VB}_9$ , c)  $\text{CrB}_9$ , and d)  $\text{MnB}_9$ .

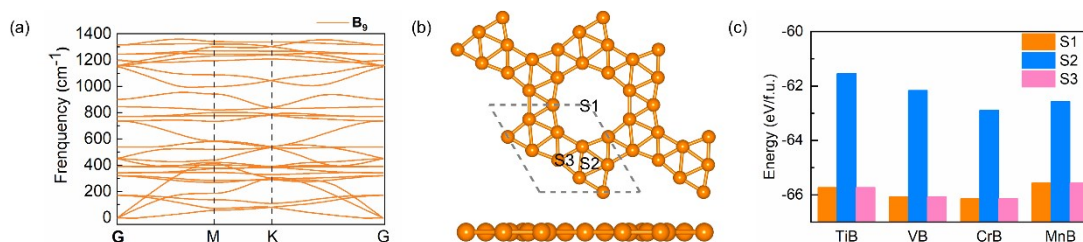

**Fig. S4** a) Calculated phonon spectrum of  $\text{B}_9$ . b) Top and side views of predicted  $\text{B}_9$  structure. S1, S2, and S3 are possible initial adsorption sites of transition-metal atoms on the surface of  $\text{B}_9$ . c) Total energy of each M adsorption configuration on the surface of  $\text{B}_9$  (M = Ti, V, Cr, Mn).

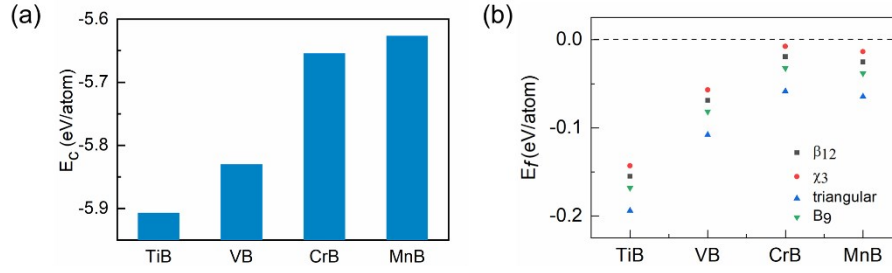

**Fig. S5** a) Cohesive energy ( $E_{\text{coh}}$ ) and b) Formation energy ( $E_f$ ) of predicted 2-D  $\text{MB}_9$  computed by using PBE functional. Four kinds of borophenes used as references including experimental  $\beta_{12}$ ,  $\chi_3$ , and triangular as well as predicted  $B_9$ .

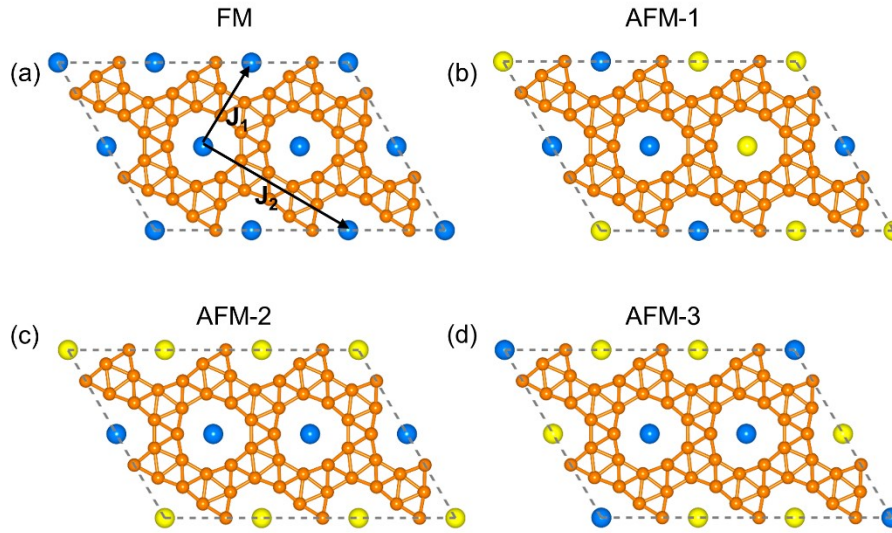

**Fig. S6** Top views of four possible collinear magnetic configurations of  $\text{MB}_9$ . a) FM, b) AFM-1, c) AFM-2, and d) AFM-3 are ferromagnetic and three different antiferromagnetic states, respectively.  $J_1$  and  $J_2$  are first nearest-neighbor ( $1^{\text{st}}$ ) and second nearest-neighbor ( $2^{\text{nd}}$ ) magnetic coupling parameters, respectively. The blue and yellow balls denote the spin-up and spin-down states of M atoms, respectively.

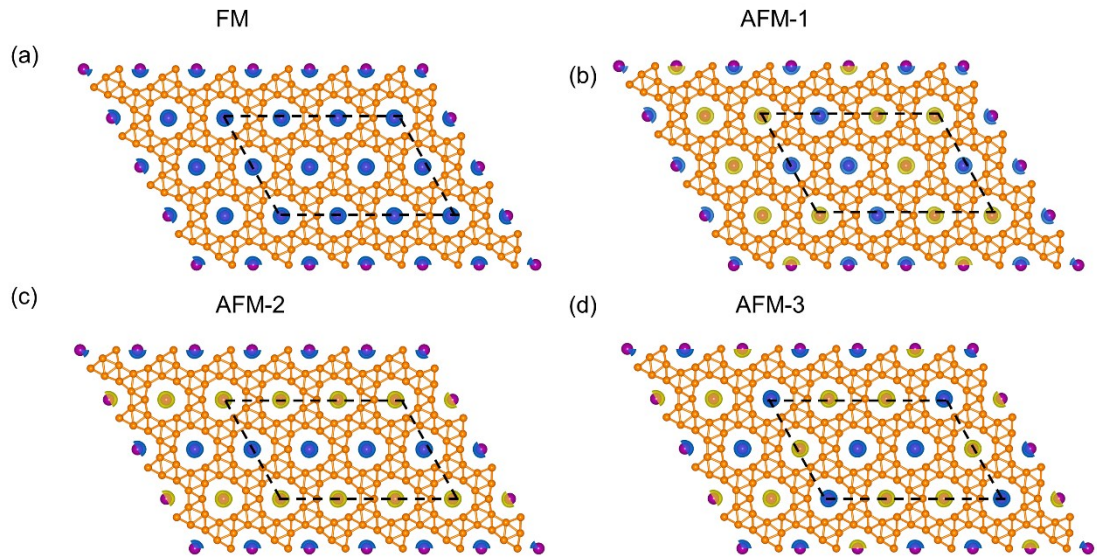

**Fig. S7** Top views of spin density distributions of FM and AFM-*i* (*i*= 1, 2, 3) for 2-D MB<sub>9</sub>. The blue and yellow colors indicate the spin-up and spin-down states (M= Mn, Cr, V), respectively. The isosurfaces of spin-up and spin-down densities were set as 0.02 e/a.u.<sup>3</sup>.

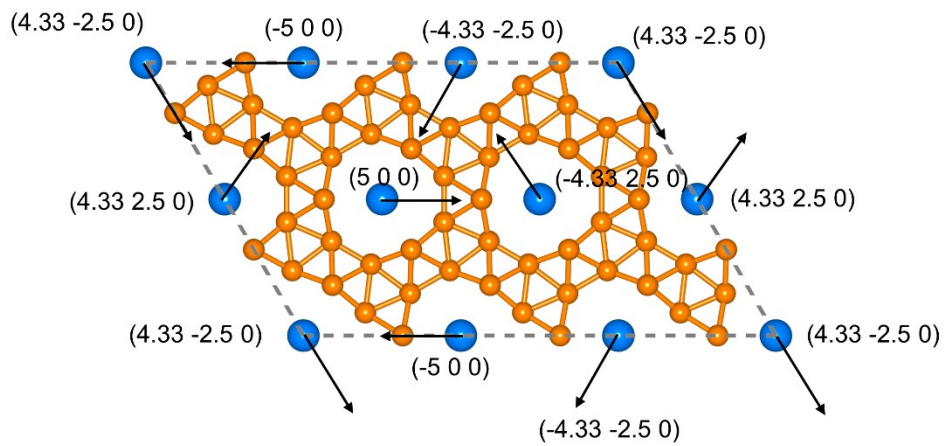

**Fig. S8** Top views of noncollinear magnetic configuration of MB<sub>9</sub>. The numbers are initial magnetic moments of M atoms in the calculation setting. The blue and orange balls indicate M (M= Mn, Cr, V) and B (B= boron) atoms, respectively.

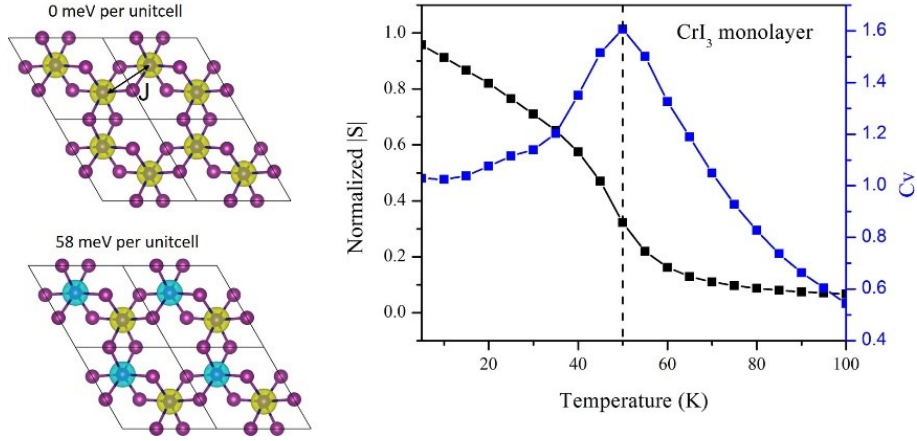

**Fig. S9** Simulated normalized  $|S|$  (black data) and specific heat  $C_V$  (blue data) as a function of temperature for monolayer  $\text{CrI}_3$ .

For monolayer  $\text{CrI}_3$ , the energy difference between FM and AFM state per unit-cell is 58.0 meV. The  $J$  is obtained by  $(E_{\text{AFM}} - E_{\text{FM}}) / 6S^2$ , where  $S$  is the spin vector of each Cr atom. Using the normalized  $|S| = 1$ ,  $J$  is 9.6 meV, which agrees with the value of 9.1 meV in same approach<sup>S1</sup>. The Curie temperature is about 50 K in Fig. S9.

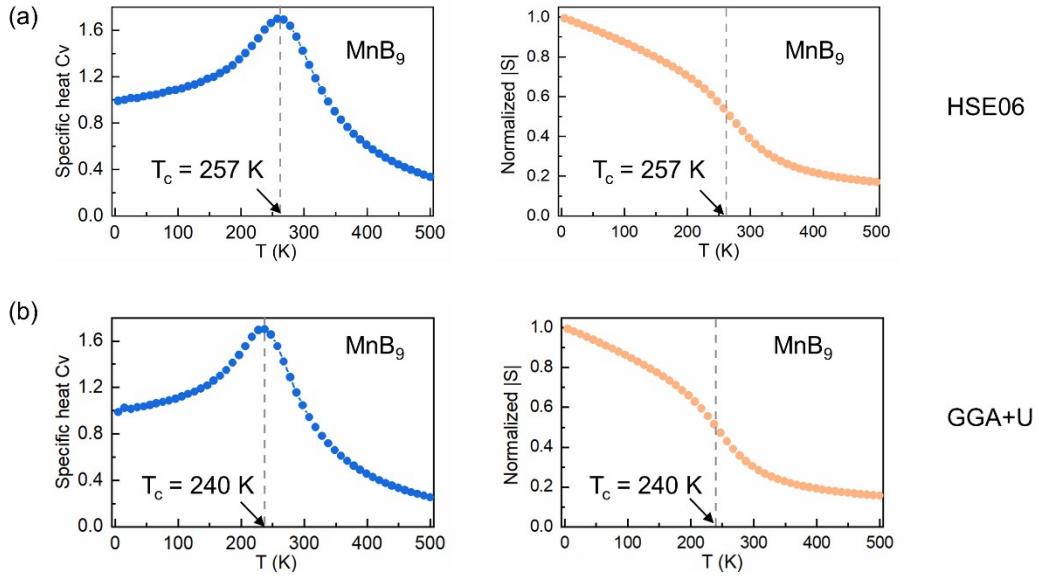

**Fig. S10** Simulated specific heat  $C_V$  and simulated normalized  $|S|$  as a function of temperature for  $\text{MnB}_9$  by employing the magnetic constant  $J_1$  computed by a) HSE06 and b) GGA+U ( $U = 2.0$  eV).

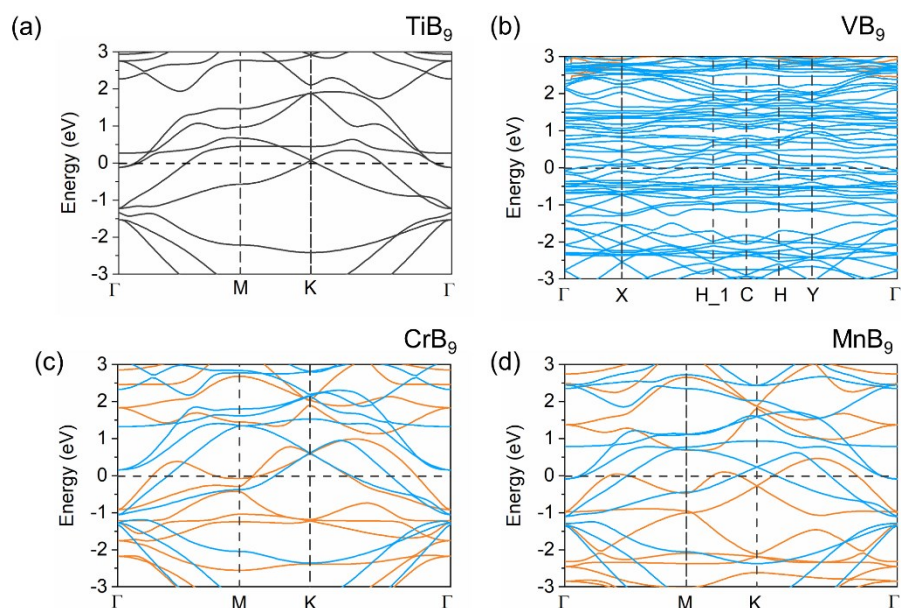

**Fig. S11** Calculated band structure of a)  $\text{TiB}_9$ , b)  $\text{VB}_9$ , c)  $\text{CrB}_9$ , and d)  $\text{MnB}_9$  in their magnetic ground state (respectively NM, AFM-3, FM, and FM) by employing PBE function. The Fermi level is set to zero. The orange and blue lines respectively stand for spin-up and spin-down channel.

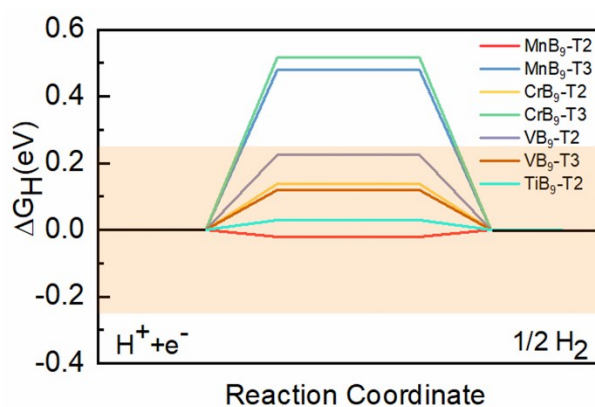

**Fig. S12** Calculated Gibbs free energy ( $\Delta G_H$ ) of hydrogen adsorption for 2-D  $\text{MB}_9$  monolayers at their relative stable adsorption sites.

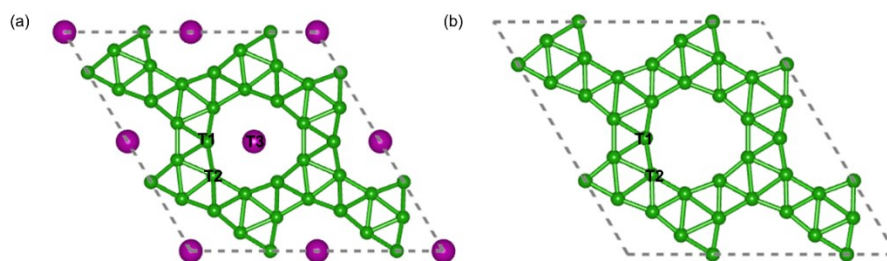

**Fig. S13** The sites for calculating Bader charge in (a)  $\text{MB}_9$ ; (b)  $\text{B}_9$ . (M= Ti, V, Cr and Mn)

**Table S1** Structural parameters and calculated magnetic moments of 2-D MB<sub>9</sub>.  $a$  (in Å) is lattice constant, SG is space group,  $l_1$  and  $l_2$  (in Å) are bond length between M and B<sub>1</sub> and B<sub>2</sub> atom, respectively,  $h$  (in Å) is layer height,  $M$  (in  $\mu\text{B}/\text{f.u.}$ ) is the total magnetic moment per formula unit by using PBE method.  $\Delta Q$  (in electron) is charge transfer from M to B atoms.

| 2-D              | $a$   | SG   | $l_1$ | $l_2$ | $h$   | $M$  | $\Delta Q$ |
|------------------|-------|------|-------|-------|-------|------|------------|
| MnB <sub>9</sub> | 5.801 | P31m | 2.182 | 2.433 | 0.366 | 3.27 | 1.48       |
| CrB <sub>9</sub> | 5.802 | P31m | 2.177 | 2.428 | 0.365 | 2.82 | 1.20       |
| VB <sub>9</sub>  | 5.784 | P31m | 2.177 | 2.413 | 0.414 | 1.72 | 1.03       |
| TiB <sub>9</sub> | 5.822 | P31m | 2.212 | 2.428 | 0.393 | 0.14 | 0.95       |

**Table S2** Calculated elastic constants  $C$  (in GPa) of 2-D MB<sub>9</sub>, graphene, MoS<sub>2</sub> and Ti<sub>2</sub>C monolayers. The data from other calculations<sup>S2, S3, S4</sup> are listed in parentheses for comparison.

| 2-D               | $C_{11}$                   | $C_{22}$                   | $C_{44}$                   | $C_{12}$                 |
|-------------------|----------------------------|----------------------------|----------------------------|--------------------------|
| MnB <sub>9</sub>  | 74.2                       | 74.2                       | 31.5                       | 11.1                     |
| CrB <sub>9</sub>  | 70.2                       | 70.2                       | 34.3                       | 1.5                      |
| VB <sub>9</sub>   | 81.2                       | 81.2                       | 38.9                       | 3.2                      |
| TiB <sub>9</sub>  | 78.1                       | 78.1                       | 40.2                       | -2.4                     |
| Graphene          | 351.6 (352.7) <sup>2</sup> | 351.6 (352.7) <sup>2</sup> | 145.4 (145.9) <sup>2</sup> | 60.9 (60.9) <sup>2</sup> |
| MoS <sub>2</sub>  | 131.1 (130) <sup>3</sup>   | 131.1 (130) <sup>3</sup>   | 49.3 (45) <sup>3</sup>     | 32.6 (40) <sup>3</sup>   |
| Ti <sub>2</sub> C | 145.4 (137) <sup>4</sup>   | 145.4 (137) <sup>4</sup>   | 57.1 (53) <sup>4</sup>     | 31.2 (31.2) <sup>4</sup> |



**Table S3** Total energies (in eV) of nonmagnetic NM state, ferromagnetic FM state, three antiferromagnetic AFM-i states (i=1, 2, 3), and noncolinear antiferromagnetic state of MB<sub>9</sub> computed by GGA function.  $J_1$  (in meV) is first nearest-neighboring (1<sup>st</sup>) magnetic coupling constant.  $T_c$  (in K) is the magnetic critical temperature.

| GGA              | $E_{NM}$ | $E_{FM}$        | $E_{AFM-1}$ | $E_{AFM-2}$ | $E_{AFM-3}$     | $E_{ncl}$ | $J_1$ | $T_c$ |
|------------------|----------|-----------------|-------------|-------------|-----------------|-----------|-------|-------|
| MnB <sub>9</sub> | -388.216 | <b>-393.371</b> | -392.875    | -392.717    | -392.715        | -392.863  | 26.9  | 360   |
| CrB <sub>9</sub> | -391.605 | <b>-396.734</b> | -396.696    | -396.613    | -396.625        | -396.649  | 4.4   | 56    |
| VB <sub>9</sub>  | -393.952 | -396.351        | -396.547    | -396.531    | <b>-396.577</b> | -396.550  | -8.7  | 25    |
| TiB <sub>9</sub> | -394.357 | -394.357        | /           | /           | /               | /         | /     | /     |

To obtain the magnetic coupling constant of monolayer MB<sub>9</sub> based on 2-D Heisenberg model, the energy in FM and three collinear AFM-i (i=1, 2, 3) states were used to compute  $J_1$  using least-squares method. The corresponding Heisenberg Hamiltonian can be further written as:

$$E_{FM} = E_0 - 18J_1|S|^2 - A|S|^2$$

$$E_{AFM-1} = E_0 + 2J_1|S|^2 - A|S|^2$$

$$E_{AFM-2} = E_0 + 6J_1|S|^2 - A|S|^2$$

$$E_{AFM-3} = E_0 + 6J_1|S|^2 - A|S|^2$$

where  $E_0$  is the energy of the nonmagnetic state,  $J_1$  is the 1<sup>st</sup> neighbor exchange coupling parameters.  $J_2$  can be obtained by using a larger supercell, for example a 4x3x1, which was omitted in the present work, considering the second-nearest neighbor distance of these MB<sub>9</sub> is larger than 10 Å and its magnetic interaction is weak.  $A$  is anisotropy energy parameter, which is obtained by using the magnetic anisotropy energies as:

$$A = \frac{E_{hard}(axis) - E_{easy}(axis)}{|S|^2}$$

The calculation of least-square method is as follow. Here, 2-D MnB<sub>9</sub> is an example.

```
Y= [-393.371 -392.875 -392.717 -392.715]';
```

```
X= [1 18;1 -2;1 -6;1 -6];
```

```
B1_3 = pinv(X'*X)*X'*Y;
```

```
B2_3 = (X'*X)^-1*X'*Y;
```

```
B3_3 = [B1_3 B2_3]
```

```
Yp = X*B2_3;
```

```
err = [abs(Y-Yp)./Y]'
```

```
Ym = mean(Y);
```

```
SStot = sum((Y-Ym).^2);
```

```
SSreg = sum((Yp-Ym).^2);
```

```
SSres = sum((Yp-Y).^2);
```

```
R2 = 1-SSres/SStot
```

```
plot(Yp,Y,'o');
```

```
hold on
```

```
plot([min(Yp) max(Yp)],[min(Yp) max(Yp)])
```

```
hold off
```

The result of J<sub>1</sub> is as follow.

```
B3_3 = -392.8926 -392.8926
```

```
      -0.0269  -0.0269
```

```
err = 1.0e-04 *
```

```
      -0.1536  -0.9225  -0.3591  -0.4100
```

```
R2= 0.9937
```

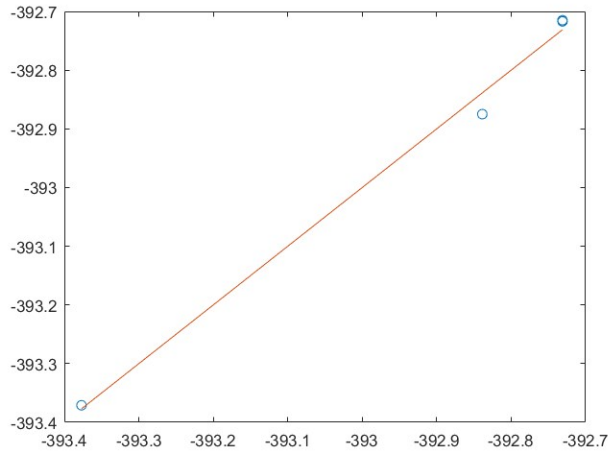

**Table S4** Magnetic anisotropy energy MAE (in  $\mu\text{eV}$ ) defined as the energy difference between the system with spin direction along the magnetic hard axis and the system with spin parallel to the magnetic easy axis.  $K_1$  and  $K_2$  (in  $\mu\text{eV}$ ) anisotropy constants.

| 2-D              | MAE    | $K_{1(XZ)}$ | $K_{2(XZ)}$ | $K_{1(YZ)}$ | $K_{2(YZ)}$ | Easy axis    |
|------------------|--------|-------------|-------------|-------------|-------------|--------------|
| MnB <sub>9</sub> | 465.06 | 468.47      | -4.04       | 468.47      | -4.04       | out-of-plane |
| CrB <sub>9</sub> | 332.80 | 332.99      | -0.21       | 332.99      | -0.21       | out-of-plane |
| VB <sub>9</sub>  | 58.47  | 55.69       | -0.04       | 50.62       | 0.05        | out-of-plane |

**Table S5** Total energies of FM and AFM states (in eV) of  $2\times 1\times 1$  MnB<sub>9</sub> computed by HSE06 and GGA+U function ( $U = 1.0, 2.0, 3.0, 4.0, 5.0$  eV).  $M$  (in  $\mu\text{B}$ ) is total magnetic moment of  $2\times 1\times 1$  MnB<sub>9</sub>.

| MnB <sub>9</sub> | $E_{\text{FM}}$ | $E_{\text{AFM}}$ | $M$  | $J_1$ |
|------------------|-----------------|------------------|------|-------|
| GGA              | -131.218        | -131.019         | 6.58 | 24.8  |
| U=1 eV           | -129.797        | -129.694         | 7.56 | 12.8  |
| U=2 eV           | -128.711        | -128.578         | 8.00 | 16.6  |
| U=3 eV           | -127.747        | -127.616         | 8.02 | 16.4  |
| U=4 eV           | -126.905        | -126.768         | 8.14 | 17.2  |
| U=5 eV           | -126.147        | -126.012         | 8.29 | 16.9  |
| HSE06            | -151.381        | -151.233         | 8.00 | 18.5  |

**Table S6** Calculated MAEs along different magnetic directions of MnB<sub>9</sub>.

| MnB <sub>9</sub> | 001        | 100        | 010        | 110        | 111        | MAE | Easy axis |
|------------------|------------|------------|------------|------------|------------|-----|-----------|
| U=2              | -64.326147 | -64.325967 | -64.325967 | -64.325967 | -64.326024 | 180 | 001       |

The corresponding Heisenberg Hamiltonian can be further written as:

$$E_{FM} = E_0 - 6J_1|S|^2 - A|S|^2$$

$$E_{AFM} = E_0 + 2J_1|S|^2 - A|S|^2$$

where  $E_0$  is the energy of the nonmagnetic state,  $J_1$  is the 1<sup>st</sup> neighbor exchange coupling parameters.

**Table S7** Calculated total energies (in eV) of all possible H adsorption configurations on MB<sub>9</sub> after structural optimization.

|                  | T1       | T2       | T3       | B1       | B2       | B3       | B4       | B5       | H1       | H2       | H3       |
|------------------|----------|----------|----------|----------|----------|----------|----------|----------|----------|----------|----------|
| TiB <sub>9</sub> | -266.581 | -266.569 | -266.581 | -266.569 | -266.569 | -266.581 | -266.569 | -266.569 | -266.569 | -266.569 | -266.569 |
| VB <sub>9</sub>  | -268.213 | -267.785 | -267.812 | -268.213 | -268.213 | -268.213 | -268.213 | -268.213 | -268.213 | -268.213 | -267.785 |
| CrB <sub>9</sub> | -268.363 | -268.043 | -267.588 | -268.363 | -268.363 | -268.363 | -268.363 | -268.363 | -268.363 | -268.363 | -268.043 |
| MnB <sub>9</sub> | -266.197 | -265.981 | -265.397 | -266.197 | -266.197 | -266.197 | -266.197 | -266.197 | -266.197 | -266.197 | -265.981 |

**Table S8** Calculate results of Bader charge (in electron) on each atom for MB<sub>9</sub> and B<sub>9</sub> within 2×2×1 supercell (M= Ti, V, Cr, Mn).  $\Delta Q$  (in electron) is the changed charge of boron atom after M atom embedding into B<sub>9</sub> monolayer.

|             | MnB <sub>9</sub> | CrB <sub>9</sub> | VB <sub>9</sub> | TiB <sub>9</sub> | B <sub>9</sub> |
|-------------|------------------|------------------|-----------------|------------------|----------------|
| T1          | 3.35             | 3.49             | 3.39            | 3.56             | 2.64           |
| T2          | 2.95             | 2.87             | 3.01            | 2.95             | 3.21           |
| T3          | 12.04            | 10.95            | 11.78           | 10.50            | /              |
| $\Delta Q1$ | 0.71             | 0.85             | 0.75            | 0.92             | /              |
| $\Delta Q2$ | -0.26            | -0.34            | -0.20           | -0.26            | /              |
| $\Delta Q3$ | 0.96             | 0.95             | 1.22            | 1.50             | /              |
| electron    | 13.00            | 12.00            | 13.00           | 12.00            | 3.00           |

## References

- [S1] Y. Zhu, X. H. Kong, T. D. Rhone, H. Guo, *Phys. Rev. Mater.*, 2018, **2**, 081001(R).
- [S2] R. C. Andrew, R. E. Mapasha, A. M. Ukpog, N. Chetty, *Phys. Rev. B*, 2012, **85**, 125428.
- [S3] R. C. Cooper, C. Lee, C. A. Marianetti, X. D. Wei, J. Hone, J. W. Kysar, *Phys. Rev. B*, 2013, **87**, 035423.
- [S4] S. Wang, J. X. Li, Y. L. Du, C. Cui. *Comp. Mater. Sci.*, 2014, **83**, 290.
